# Supplementary material for: Cardiac Fibrosis and Innervation State in Uncorrected and Corrected Transposition of the Great Arteries: A Postmortem Histological Analysis and Systematic Review
Source: MDPI journal article supplement (doi:10.3390/jcdd10040180), 2023-04-20
Supplement: s1 [file s1]

## Supplement:

**Supplemental Figure S1:** Fibrosis quantification steps

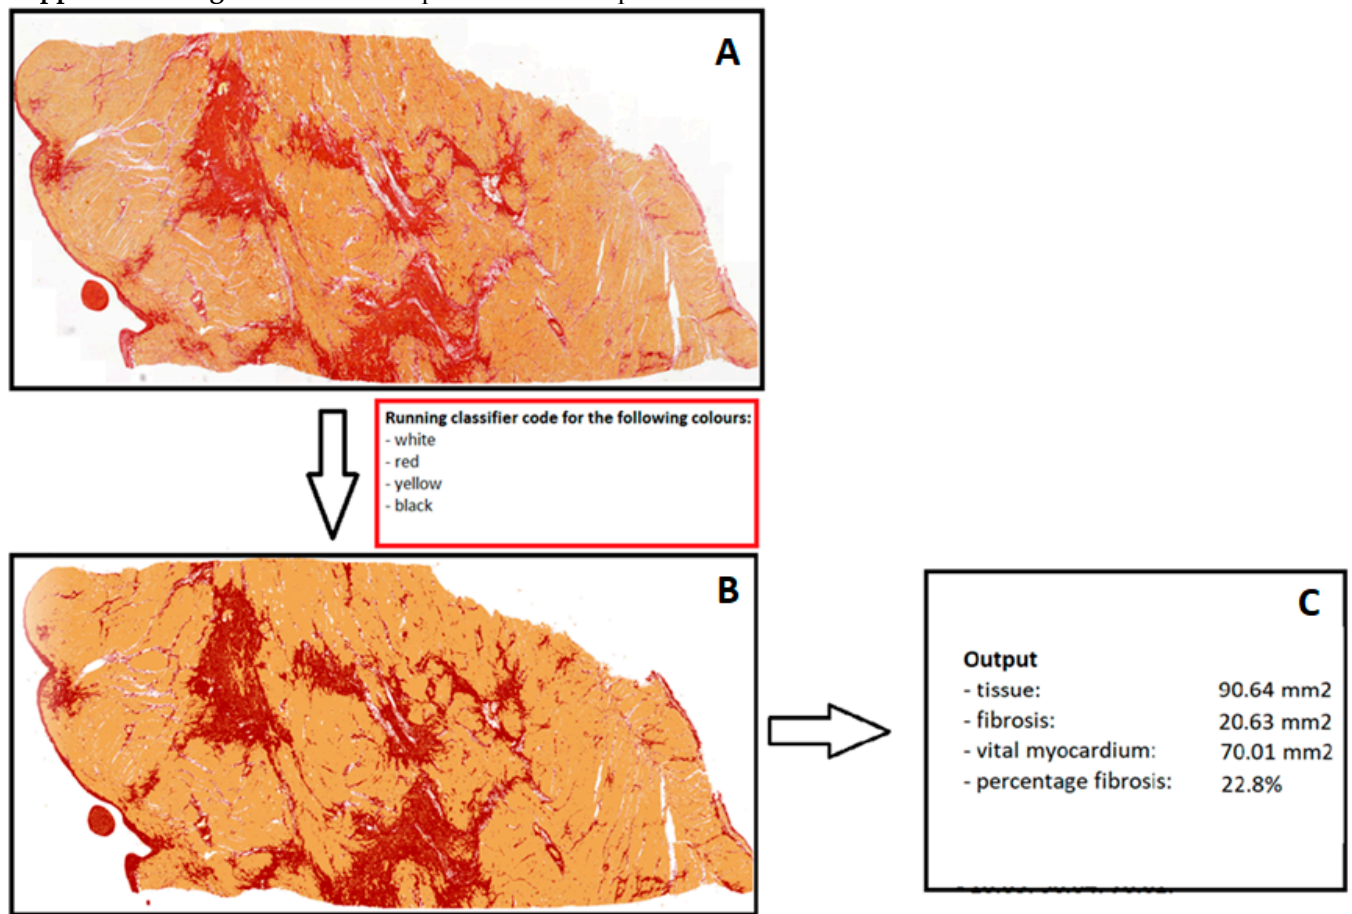

**Supplemental Figure S1:** Fibrosis quantification steps with Custom software (Python, 2.7). Panel A: Image of Picrosirius Red staining of the myocardium. Wall thickness for each biopsy was measured and each pixel in the image was classified as red (collagen), yellow (myocardium), black (nuclei) or white (non-staining tissue) (Panel B). The amount of collagen was calculated as percentage of the total tissue area by dividing the number of red pixels by the sum of red, black, and yellow pixels (Panel C)

**Supplemental Figure S2:** PRISMA flow diagram; search on myocardial fibrosis in TGA and cardiac innervation post ASO

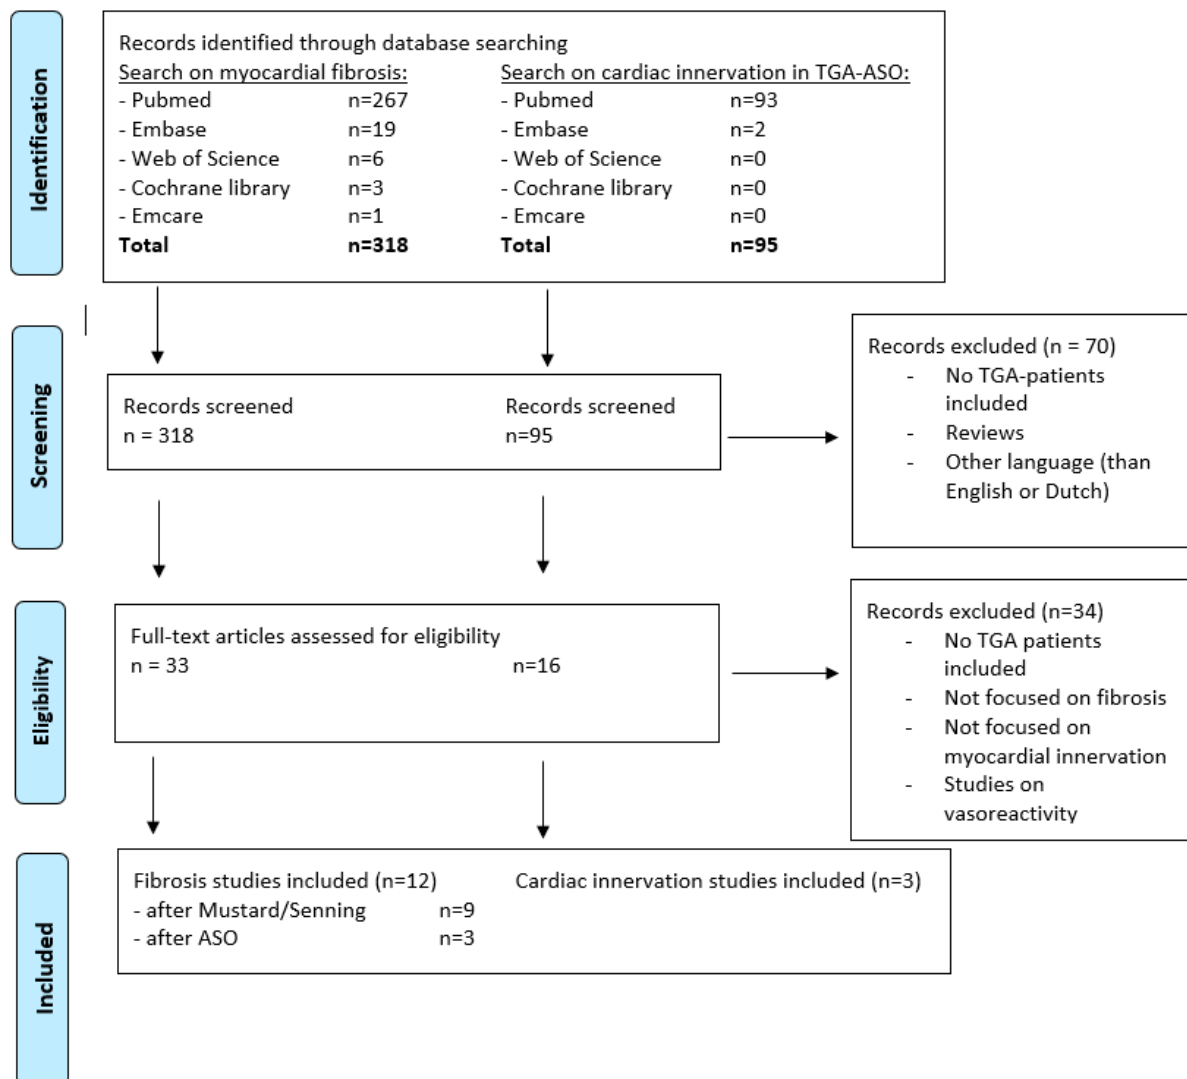

**Supplemental Figure S2.** PRISMA flow diagram; Literature search on myocardial fibrosis in TGA and cardiac innervation post-ASO. Abbreviations; ASO, arterial switch operation; TGA, transposition of the great arteries;

**Supplemental Table S1.** List of antibodies

| Primary Antibodies | Indication           | Species | Clonality  | Dilution | Source               |
|--------------------|----------------------|---------|------------|----------|----------------------|
| Cardiac troponin-I | Myocardial structure | Rabbit  | Polyclonal | 1:1000   | Abcam; AB47003       |
| TUBB3              | Cardiac innervation  | Rabbit  | Polyclonal | 1:8000   | Sigma-Aldrich; T3952 |
| N-cadherin *       | Adherence junctions  | Mouse   | Monoclonal | 1:200    | Sigma-Aldrich; C3865 |
| PECAM1 *           | Endothelial cells    | Rabbit  | Polyclonal | 1:1000   | Santa Cruz; sc1506R  |

**Supplemental Table S1.** List of primary antibodies. Abbreviations; TUBB3,  $\beta$ III-tubulin; PECAM-1, platelet endothelial cell adhesion molecule-1.

### Search strategy myocardial fibrosis in TGA:

#### PubMed

<http://www.ncbi.nlm.nih.gov/pubmed?otool=leiden>

((("Transposition of Great Vessels"[Mesh] OR "transposition of the great arteries"[tw] OR "transposition of the great artery"[tw] OR "transposition of great arteries"[tw] OR "transposition of great artery"[tw] OR "transposition of the great vessels"[tw] OR "transposition of great vessels"[tw] OR "transposition of great vessel"[tw] OR "great vessels transposition"[tw] OR "great arteries transposition"[tw] OR "congenitally corrected transposition"[tw] OR "congenitally corrected transpositions"[tw] OR "double outlet right ventricle"[tw] OR "double outlet right ventricles"[tw] OR "taussig bing anomaly"[tw] OR ("transposition"[tw] OR "transpositions"[tw] OR "transpos\*"[tw] OR ("TGA"[tw] NOT "transient global amnesia"[tw])) AND ("great vessel"[tw] OR "great vessels"[tw] OR "great arteries"[tw] OR "great artery"[tw] OR "large vessel"[tw] OR "large vessels"[tw] OR "large arteries"[tw] OR "large artery"[tw] OR "Aorta"[mesh] OR "aorta"[tw] OR "aortas"[tw] OR "aortic"[tw])) OR "Arterial Switch Operation"[Mesh] OR "atrial switch"[tw] OR "arterial switch"[tw] OR "atrial switch\*"[tw] OR "arterial switch\*"[tw] OR "double switch operation"[tw] OR "double switch procedure"[tw] OR "double switch technique"[tw] OR "double switch operations"[tw] OR "double switch procedures"[tw] OR "double switch"[tw] OR "jatene operation"[tw] OR "jatene procedure"[tw] OR "jatene technique"[tw] OR "mustard operation"[tw] OR "mustard procedure"[tw] OR "mustard repair"[tw] OR "rastelli operation"[tw] OR "rastelli procedure"[tw] OR "rastelli repair"[tw] OR "rastelli technique"[tw] OR "senning operation"[tw] OR "senning procedure"[tw] OR "jatene"[tw] OR "mustard child\*"[tw] OR "mustard patient\*"[tw] OR "rastelli"[tw] OR "senning"[tw]) AND ("Fibrosis"[Mesh:noexp] OR "fibrosis"[tw] OR "fibroses"[tw] OR "fibrotic"[tw] OR "fibros\*"[tw] OR "fibrot\*"[tw] OR "fibrous"[tw] OR "Fibroblasts"[mesh:noexp] OR "fibroblast"[tw] OR "fibroblasts"[tw] OR "Myofibroblasts"[mesh] OR "myofibroblast"[tw] OR "myofibroblasts"[tw] OR "fibroblast\*"[tw] OR "fibrocellular"[tw] OR "fibrocell\*"[tw] OR "fibrocollagen\*"[tw] OR "fibrocollagenous"[tw] OR "myocardial remodelling"[tw] OR "myocardial remodeling"[tw] OR "myocardium remodelling"[tw] OR "myocardium remodeling"[tw] OR "myocardial remodel\*"[tw] OR "myocardium remodel\*"[tw] OR "Ventricular Remodeling"[Mesh] OR "Ventricular Remodelling"[tw] OR "Ventricular Remodeling"[tw] OR "Ventricle Remodelling"[tw] OR "Ventricle Remodeling"[tw] OR "Ventricular Remodel\*"[tw] OR "Ventricle Remodel\*"[tw] OR "cardiac remodelling"[tw] OR "cardiac remodeling"[tw] OR "cardiac remodel\*"[tw]) NOT (27885969[uid])) **OR** (("Arterial Switch Operation"[Mesh] OR "atrial switch"[tw] OR "arterial switch"[tw] OR "atrial switch\*"[tw] OR "arterial switch\*"[tw] OR "double switch operation"[tw] OR "double switch procedure"[tw] OR "double switch technique"[tw] OR "double switch operations"[tw] OR "double switch procedures"[tw] OR "double switch"[tw] OR "jatene operation"[tw] OR "jatene procedure"[tw] OR "jatene technique"[tw] OR "mustard operation"[tw] OR "mustard procedure"[tw] OR "mustard repair"[tw] OR "rastelli operation"[tw] OR "rastelli procedure"[tw] OR "rastelli repair"[tw] OR "rastelli technique"[tw] OR "senning operation"[tw] OR "senning procedure"[tw] OR "jatene"[tw] OR "mustard child\*"[tw] OR "mustard patient\*"[tw] OR

"rastelli"[tw] OR "senning"[tw]) AND ("Histological Techniques"[Mesh] OR "Histology"[Mesh] OR "histology"[tw] OR "histolog\*"[tw] OR "histocyto\*"[tw]))

## Embase

<http://ovidsp.ovid.com/ovidweb.cgi?T=JS&PAGE=main&MODE=ovid&D=oemezd>

((exp \*Great Vessels Transposition"/ OR "transposition of the great arteries".ti,ab OR "transposition of the great artery".ti,ab OR "transposition of great arteries".ti,ab OR "transposition of great artery".ti,ab OR "transposition of the great vessels".ti,ab OR "transposition of great vessels".ti,ab OR "transposition of great vessel".ti,ab OR "great vessels transposition".ti,ab OR "great arteries transposition".ti,ab OR "congenitally corrected transposition".ti,ab OR "congenitally corrected transpositions".ti,ab OR "double outlet right ventricle".ti,ab OR "double outlet right ventricles".ti,ab OR "taussig bing anomaly".ti,ab OR ("transposition".ti,ab OR "transpositions".ti,ab OR "transpos\*".ti,ab OR ("TGA".ti,ab NOT "transient global amnesia".ti,ab)) AND ("great vessel".ti,ab OR "great vessels".ti,ab OR "great arteries".ti,ab OR "great artery".ti,ab OR "large vessel".ti,ab OR "large vessels".ti,ab OR "large arteries".ti,ab OR "large artery".ti,ab OR exp \*Aorta"/ OR "aorta".ti,ab OR "aortas".ti,ab OR "aortic".ti,ab OR exp \*great blood vessel/)) OR exp \*Arterial Switch Operation"/ OR "atrial switch".ti,ab OR "arterial switch".ti,ab OR "atrial switch\*".ti,ab OR "arterial switch\*".ti,ab OR "double switch operation".ti,ab OR "double switch procedure".ti,ab OR "double switch technique".ti,ab OR "double switch operations".ti,ab OR "double switch procedures".ti,ab OR "double switch".ti,ab OR "jatene operation".ti,ab OR "jatene procedure".ti,ab OR "jatene technique".ti,ab OR "mustard operation".ti,ab OR "mustard procedure".ti,ab OR "mustard repair".ti,ab OR "rastelli operation".ti,ab OR "rastelli procedure".ti,ab OR "rastelli repair".ti,ab OR "rastelli technique".ti,ab OR "senning operation".ti,ab OR "senning procedure".ti,ab OR "jatene".ti,ab OR "mustard child\*".ti,ab OR "mustard patient\*".ti,ab OR "rastelli".ti,ab OR "senning".ti,ab) AND (\*Fibrosis"/ OR \*heart muscle fibrosis"/ OR "fibrosis".ti,ab OR "fibroses".ti,ab OR "fibrotic".ti,ab OR "fibros\*".ti,ab OR "fibrot\*".ti,ab OR "fibrous".ti,ab OR \*Fibroblast"/ OR \*Heart Fibroblast"/ OR "fibroblast".ti,ab OR "fibroblasts".ti,ab OR \*Myofibroblast"/ OR "myofibroblast".ti,ab OR "myofibroblasts".ti,ab OR "fibroblast\*".ti,ab OR "fibrocellular".ti,ab OR "fibrocell\*".ti,ab OR "fibrocollagen\*".ti,ab OR "fibrocollagenous".ti,ab OR "myocardial remodelling".ti,ab OR "myocardial remodeling".ti,ab OR "myocardium remodelling".ti,ab OR "myocardium remodeling".ti,ab OR "myocardial remodel\*".ti,ab OR "myocardium remodel\*".ti,ab OR \*Heart Ventricl Remodeling"/ OR "Ventricular Remodelling".ti,ab OR "Ventricular Remodeling".ti,ab OR "Ventricle Remodelling".ti,ab OR "Ventricle Remodeling".ti,ab OR "Ventricular Remodel\*".ti,ab OR "Ventricle Remodel\*".ti,ab OR "cardiac remodelling".ti,ab OR "cardiac remodeling".ti,ab OR "cardiac remodel\*".ti,ab)) OR ((exp \*Arterial Switch Operation"/ OR "atrial switch".ti,ab OR "arterial switch".ti,ab OR "atrial switch\*".ti,ab OR "arterial switch\*".ti,ab OR "double switch operation".ti,ab OR "double switch procedure".ti,ab OR "double switch technique".ti,ab OR "double switch operations".ti,ab OR "double switch procedures".ti,ab OR "double switch".ti,ab OR "jatene operation".ti,ab OR "jatene procedure".ti,ab OR "jatene technique".ti,ab OR "mustard operation".ti,ab OR "mustard procedure".ti,ab OR "mustard repair".ti,ab OR "rastelli operation".ti,ab OR "rastelli procedure".ti,ab OR "rastelli repair".ti,ab OR "rastelli technique".ti,ab OR "senning operation".ti,ab OR "senning procedure".ti,ab OR "jatene".ti,ab OR "mustard child\*".ti,ab OR "mustard patient\*".ti,ab OR "rastelli".ti,ab OR "senning".ti,ab) AND (exp \*Histology"/ OR "histology".ti,ab OR "histolog\*".ti,ab OR "histocyto\*".ti,ab)))

- o NOT conference review.pt
- o NOT (conference review or conference abstract).pt
- o AND (conference abstract).pt

## Web of Science

<http://isiknowledge.com/wos>

((TI=("Great Vessels Transposition" OR "transposition of the great arteries" OR "transposition of the great artery" OR "transposition of great arteries" OR "transposition of great vessel" OR "great vessels transposition" OR "great arteries transposition" OR "congenitally corrected transposition" OR "congenitally corrected transpositions" OR "double outlet right ventricle" OR "double outlet right ventricles" OR "taussig bing anomaly" OR (("transposition" OR "transpositions" OR "transpos\*" OR ("TGA" NOT "transient global amnesia")) AND ("great vessel" OR "great vessels" OR "great arteries" OR "great artery" OR "large vessel" OR "large vessels" OR "large arteries" OR "large artery" OR "Aorta" OR "aorta" OR "aortas" OR "aortic" OR "great blood vessel")) OR "Arterial Switch Operation" OR "atrial switch" OR "arterial switch" OR "atrial switch\*" OR "arterial switch\*" OR "double switch operation" OR "double switch procedure" OR "double switch technique" OR "double switch operations" OR "double switch procedures" OR "double switch" OR "jatene operation" OR "jatene procedure" OR "jatene technique" OR "mustard operation" OR "mustard procedure" OR "mustard repair" OR "rastelli operation" OR "rastelli procedure" OR "rastelli repair" OR "rastelli technique" OR "senning operation" OR "senning procedure" OR "jatene" OR "mustard child\*" OR "mustard patient\*" OR "rastelli" OR "senning") OR AK=("Great Vessels Transposition" OR "transposition of the great arteries" OR "transposition of the great artery" OR "transposition of great arteries" OR "transposition of great artery" OR "transposition of the great vessels" OR "transposition of great vessels" OR "transposition of great vessel" OR "great vessels transposition" OR "great arteries transposition" OR "congenitally corrected transposition" OR "congenitally corrected transpositions" OR "double outlet right ventricle" OR "double outlet right ventricles" OR "taussig bing anomaly" OR (("transposition" OR "transpositions" OR "transpos\*" OR ("TGA" NOT "transient global amnesia")) AND ("great vessel" OR "great vessels" OR "great arteries" OR "great artery" OR "large vessel" OR "large vessels" OR "large arteries" OR "large artery" OR "Aorta" OR "aorta" OR "aortas" OR "aortic" OR "great blood vessel")) OR "Arterial Switch Operation" OR "atrial switch" OR "arterial switch" OR "atrial switch\*" OR "arterial switch\*" OR "double switch operation" OR "double switch procedure" OR "double switch technique" OR "double switch operations" OR "double switch procedures" OR "double switch" OR "jatene operation" OR "jatene procedure" OR "jatene technique" OR "mustard operation" OR "mustard procedure" OR "mustard repair" OR "rastelli operation" OR "rastelli procedure" OR "rastelli repair" OR "rastelli technique" OR "senning operation" OR "senning procedure" OR "jatene" OR "mustard child\*" OR "mustard patient\*" OR "rastelli" OR "senning") OR AB=("Great Vessels Transposition" OR "transposition of the great arteries" OR "transposition of the great artery" OR "transposition of great arteries" OR "transposition of great artery" OR "transposition of the great vessels" OR "transposition of great vessels" OR "transposition of great vessel" OR "great vessels transposition" OR "great arteries transposition" OR "congenitally corrected transposition" OR "congenitally corrected transpositions" OR "double outlet right ventricle" OR "double outlet right ventricles" OR "taussig bing anomaly" OR (("transposition" OR "transpositions" OR "transpos\*" OR ("TGA" NOT "transient global amnesia")) AND ("great vessel" OR "great vessels" OR "great arteries" OR "great artery" OR "large vessel" OR "large vessels" OR "large arteries" OR "large artery" OR "Aorta" OR "aorta" OR "aortas" OR "aortic" OR "great blood vessel")) OR "Arterial Switch Operation" OR "atrial switch" OR "arterial switch" OR "atrial switch\*" OR "arterial switch\*" OR "double switch operation" OR "double switch procedure" OR "double switch technique" OR "double switch operations" OR "double switch procedures" OR "double switch" OR "jatene operation" OR "jatene procedure" OR "jatene technique" OR "mustard operation" OR "mustard procedure" OR "mustard repair" OR "rastelli operation" OR "rastelli procedure" OR "rastelli repair" OR "rastelli technique" OR "senning operation" OR "senning procedure" OR "jatene" OR "mustard child\*" OR "mustard patient\*" OR "rastelli" OR "senning")) AND (TI=("Fibrosis" OR "heart muscle fibrosis" OR "fibrosis" OR "fibroses" OR "fibrotic" OR "fibros\*" OR "fibrot\*" OR "fibrous" OR "Fibroblast" OR "Heart Fibroblast" OR "fibroblast" OR "fibroblasts" OR "Myofibroblast" OR "myofibroblast" OR



"myofibroblasts" OR "fibroblast\*" OR "fibrocellular" OR "fibrocell\*" OR "fibrocollagen\*" OR "fibrocollagenous" OR "myocardial remodelling" OR "myocardial remodeling" OR "myocardium remodelling" OR "myocardium remodeling" OR "myocardial remodel\*" OR "myocardium remodel\*" OR "Heart Ventricl Remodeling" OR "Ventricular Remodelling" OR "Ventricular Remodeling" OR "Ventricle Remodelling" OR "Ventricle Remodeling" OR "Ventricular Remodel\*" OR "Ventricle Remodel\*" OR "cardiac remodelling" OR "cardiac remodeling" OR "cardiac remodel\*") OR AK=("Fibrosis" OR "heart muscle fibrosis" OR "fibrosis" OR "fibroses" OR "fibrotic" OR "fibros\*" OR "fibrot\*" OR "fibrous" OR "Fibroblast" OR "Heart Fibroblast" OR "fibroblast" OR "fibroblasts" OR "Myofibroblast" OR "myofibroblast" OR "myofibroblasts" OR "fibroblast\*" OR "fibrocellular" OR "fibrocell\*" OR "fibrocollagen\*" OR "fibrocollagenous" OR "myocardial remodelling" OR "myocardial remodeling" OR "myocardium remodelling" OR "myocardium remodeling" OR "myocardial remodel\*" OR "myocardium remodel\*" OR "Heart Ventricl Remodeling" OR "Ventricular Remodelling" OR "Ventricular Remodeling" OR "Ventricle Remodelling" OR "Ventricle Remodeling" OR "Ventricular Remodel\*" OR "Ventricle Remodel\*" OR "cardiac remodelling" OR "cardiac remodeling" OR "cardiac remodel\*") OR AB=("Fibrosis" OR "heart muscle fibrosis" OR "fibrosis" OR "fibroses" OR "fibrotic" OR "fibros\*" OR "fibrot\*" OR "fibrous" OR "Fibroblast" OR "Heart Fibroblast" OR "fibroblast" OR "fibroblasts" OR "Myofibroblast" OR "myofibroblast" OR "myofibroblasts" OR "fibroblast\*" OR "fibrocellular" OR "fibrocell\*" OR "fibrocollagen\*" OR "fibrocollagenous" OR "myocardial remodelling" OR "myocardial remodeling" OR "myocardium remodelling" OR "myocardium remodeling" OR "myocardial remodel\*" OR "myocardium remodel\*" OR "Heart Ventricl Remodeling" OR "Ventricular Remodelling" OR "Ventricular Remodeling" OR "Ventricle Remodelling" OR "Ventricle Remodeling" OR "Ventricular Remodel\*" OR "Ventricle Remodel\*" OR "cardiac remodelling" OR "cardiac remodeling" OR "cardiac remodel\*")) OR ((TI=("Arterial Switch Operation" OR "atrial switch" OR "arterial switch" OR "atrial switch\*" OR "arterial switch\*" OR "double switch operation" OR "double switch procedure" OR "double switch technique" OR "double switch operations" OR "double switch procedures" OR "double switch" OR "jatene operation" OR "jatene procedure" OR "jatene technique" OR "mustard operation" OR "mustard procedure" OR "mustard repair" OR "rastelli operation" OR "rastelli procedure" OR "rastelli repair" OR "rastelli technique" OR "senning operation" OR "senning procedure" OR "senning" OR "jatene" OR "mustard child\*" OR "mustard patient\*" OR "rastelli" OR "senning") OR AK=("Arterial Switch Operation" OR "atrial switch" OR "arterial switch" OR "atrial switch\*" OR "arterial switch\*" OR "double switch operation" OR "double switch procedure" OR "double switch technique" OR "double switch operations" OR "double switch procedures" OR "double switch" OR "jatene operation" OR "jatene procedure" OR "jatene technique" OR "mustard operation" OR "mustard procedure" OR "mustard repair" OR "rastelli operation" OR "rastelli procedure" OR "rastelli repair" OR "rastelli technique" OR "senning operation" OR "senning procedure" OR "senning" OR "jatene" OR "mustard child\*" OR "mustard patient\*" OR "rastelli" OR "senning") OR AB=("Arterial Switch Operation" OR "atrial switch" OR "arterial switch" OR "atrial switch\*" OR "arterial switch\*" OR "double switch operation" OR "double switch procedure" OR "double switch technique" OR "double switch operations" OR "double switch procedures" OR "double switch" OR "jatene operation" OR "jatene procedure" OR "jatene technique" OR "mustard operation" OR "mustard procedure" OR "mustard repair" OR "rastelli operation" OR "rastelli procedure" OR "rastelli repair" OR "rastelli technique" OR "senning operation" OR "senning procedure" OR "senning" OR "jatene" OR "mustard child\*" OR "mustard patient\*" OR "rastelli" OR "senning")) AND (TI=("Histology" OR "histology" OR "histolog\*" OR "histocyto\*") OR AK=("Histology" OR "histology" OR "histolog\*" OR "histocyto\*") OR AB=("Histology" OR "histology" OR "histolog\*" OR "histocyto\*"))))

**Cochrane**

<https://www.cochranelibrary.com/advanced-search/search-manager>

((("Great Vessels Transposition" OR "transposition of the great arteries" OR "transposition of the great artery" OR "transposition of great arteries" OR "transposition of great artery" OR "transposition of the great vessels" OR "transposition of great vessels" OR "transposition of great vessel" OR "great vessels transposition" OR "great arteries transposition" OR "congenitally corrected transposition" OR "congenitally corrected transpositions" OR "double outlet right ventricle" OR "double outlet right ventricles" OR "taussig bing anomaly" OR ("transposition" OR "transpositions" OR "transpos\*" OR ("TGA" NOT "transient global amnesia")) AND ("great vessel" OR "great vessels" OR "great arteries" OR "great artery" OR "large vessel" OR "large vessels" OR "large arteries" OR "large artery" OR "Aorta" OR "aorta" OR "aortas" OR "aortic" OR "great blood vessel")) OR "Arterial Switch Operation" OR "atrial switch" OR "arterial switch" OR "atrial switch\*" OR "arterial switch\*" OR "double switch operation" OR "double switch procedure" OR "double switch technique" OR "double switch operations" OR "double switch procedures" OR "double switch" OR "jatene operation" OR "jatene procedure" OR "jatene technique" OR "mustard operation" OR "mustard procedure" OR "mustard repair" OR "rastelli operation" OR "rastelli procedure" OR "rastelli repair" OR "rastelli technique" OR "senning operation" OR "senning procedure" OR "jatene" OR "mustard child\*" OR "mustard patient\*" OR "rastelli" OR "senning") AND ("Fibrosis" OR "heart muscle fibrosis" OR "fibrosis" OR "fibroses" OR "fibrotic" OR "fibros\*" OR "fibrot\*" OR "fibrous" OR "Fibroblast" OR "Heart Fibroblast" OR "fibroblast" OR "fibroblasts" OR "Myofibroblast" OR "myofibroblast" OR "myofibroblasts" OR "fibroblast\*" OR "fibrocellular" OR "fibrocell\*" OR "fibrocollagen\*" OR "fibrocollagenous" OR "myocardial remodelling" OR "myocardial remodeling" OR "myocardium remodelling" OR "myocardium remodeling" OR "myocardial remodel\*" OR "myocardium remodel\*" OR "Heart Ventricl Remodeling" OR "Ventricular Remodelling" OR "Ventricular Remodeling" OR "Ventricle Remodelling" OR "Ventricle Remodeling" OR "Ventricular Remodel\*" OR "Ventricle Remodel\*" OR "cardiac remodelling" OR "cardiac remodeling" OR "cardiac remodel\*")) OR ("Arterial Switch Operation" OR "atrial switch" OR "arterial switch" OR "atrial switch\*" OR "arterial switch\*" OR "double switch operation" OR "double switch procedure" OR "double switch technique" OR "double switch operations" OR "double switch procedures" OR "double switch" OR "jatene operation" OR "jatene procedure" OR "jatene technique" OR "mustard operation" OR "mustard procedure" OR "mustard repair" OR "rastelli operation" OR "rastelli procedure" OR "rastelli repair" OR "rastelli technique" OR "senning operation" OR "senning procedure" OR "jatene" OR "mustard child\*" OR "mustard patient\*" OR "rastelli" OR "senning") AND ("Histology" OR "histology" OR "histolog\*" OR "histocyto\*"))):ti,ab,kw

**Emcare** <http://ovidsp.ovid.com/ovidweb.cgi?T=JS&NEWS=n&CSC=Y&PAGE=main&D=emcr>

((exp \*("Great Vessels Transposition"/ OR "transposition of the great arteries".ti,ab OR "transposition of the great artery".ti,ab OR "transposition of great arteries".ti,ab OR "transposition of great artery".ti,ab OR "transposition of the great vessels".ti,ab OR "transposition of great vessels".ti,ab OR "transposition of great vessel".ti,ab OR "great vessels transposition".ti,ab OR "great arteries transposition".ti,ab OR "congenitally corrected transposition".ti,ab OR "congenitally corrected transpositions".ti,ab OR "double outlet right ventricle".ti,ab OR "double outlet right ventricles".ti,ab OR "taussig bing anomaly".ti,ab OR ("transposition".ti,ab OR "transpositions".ti,ab OR "transpos\*".ti,ab OR ("TGA".ti,ab NOT "transient global amnesia".ti,ab)) AND ("great vessel".ti,ab OR "great vessels".ti,ab OR "great arteries".ti,ab OR "great artery".ti,ab OR "large vessel".ti,ab OR "large vessels".ti,ab OR "large arteries".ti,ab OR "large artery".ti,ab OR exp \*("Aorta"/ OR "aorta".ti,ab OR "aortas".ti,ab OR "aortic".ti,ab OR exp \*("great blood vessel"/)) OR exp \*("Arterial Switch Operation"/ OR "atrial switch".ti,ab OR "arterial switch".ti,ab OR "atrial switch\*".ti,ab OR "arterial switch\*".ti,ab OR "double switch operation".ti,ab OR "double switch procedure".ti,ab OR "double switch technique".ti,ab OR "double switch operations".ti,ab OR "double switch procedures".ti,ab OR "double switch".ti,ab OR "jatene operation".ti,ab OR "jatene procedure".ti,ab OR "jatene technique".ti,ab OR "mustard operation".ti,ab OR "mustard procedure".ti,ab OR "mustard repair".ti,ab OR "rastelli operation".ti,ab OR "rastelli procedure".ti,ab OR

"rastelli repair".ti,ab OR "rastelli technique".ti,ab OR "senning operation".ti,ab OR "senning procedure".ti,ab OR "jatene".ti,ab OR "mustard child\*".ti,ab OR "mustard patient\*".ti,ab OR "rastelli".ti,ab OR "senning".ti,ab) AND (\*"Fibrosis"/ OR \*"heart muscle fibrosis"/ OR "fibrosis".ti,ab OR "fibroses".ti,ab OR "fibrotic".ti,ab OR "fibros\*".ti,ab OR "fibrot\*".ti,ab OR "fibrous".ti,ab OR \*"Fibroblast"/ OR \*"Heart Fibroblast"/ OR "fibroblast".ti,ab OR "fibroblasts".ti,ab OR \*"Myofibroblast"/ OR "myofibroblast".ti,ab OR "myofibroblasts".ti,ab OR "fibroblast\*".ti,ab OR "fibrocellular".ti,ab OR "fibrocell\*".ti,ab OR "fibrocollagen\*".ti,ab OR "fibrocollagenous".ti,ab OR "myocardial remodelling".ti,ab OR "myocardial remodeling".ti,ab OR "myocardium remodelling".ti,ab OR "myocardium remodeling".ti,ab OR "myocardial remodel\*".ti,ab OR "myocardium remodel\*".ti,ab OR \*"Heart Ventricle Remodeling"/ OR "Ventricular Remodelling".ti,ab OR "Ventricular Remodeling".ti,ab OR "Ventricle Remodelling".ti,ab OR "Ventricle Remodeling".ti,ab OR "Ventricular Remodel\*".ti,ab OR "Ventricle Remodel\*".ti,ab OR "cardiac remodelling".ti,ab OR "cardiac remodeling".ti,ab OR "cardiac remodel\*".ti,ab)) OR ((exp \*"Arterial Switch Operation"/ OR "atrial switch".ti,ab OR "arterial switch".ti,ab OR "atrial switch\*".ti,ab OR "arterial switch\*".ti,ab OR "double switch operation".ti,ab OR "double switch procedure".ti,ab OR "double switch technique".ti,ab OR "double switch operations".ti,ab OR "double switch procedures".ti,ab OR "double switch".ti,ab OR "jatene operation".ti,ab OR "jatene procedure".ti,ab OR "jatene technique".ti,ab OR "mustard operation".ti,ab OR "mustard procedure".ti,ab OR "mustard repair".ti,ab OR "rastelli operation".ti,ab OR "rastelli procedure".ti,ab OR "rastelli repair".ti,ab OR "rastelli technique".ti,ab OR "senning operation".ti,ab OR "senning procedure".ti,ab OR "jatene".ti,ab OR "mustard child\*".ti,ab OR "mustard patient\*".ti,ab OR "rastelli".ti,ab OR "senning".ti,ab) AND (exp \*"Histology"/ OR "histology".ti,ab OR "histolog\*".ti,ab OR "histocyto\*".ti,ab)))

#### Academic Search Premier

<http://search.ebscohost.com/login.aspx?authtype=ip,uid&profile=lumc&defaultdb=aph>

((TI("Great Vessels Transposition" OR "transposition of the great arteries" OR "transposition of the great artery" OR "transposition of great arteries" OR "transposition of great artery" OR "transposition of the great vessels" OR "transposition of great vessels" OR "transposition of great vessel" OR "great vessels transposition" OR "great arteries transposition" OR "congenitally corrected transposition" OR "congenitally corrected transpositions" OR "double outlet right ventricle" OR "double outlet right ventricles" OR "taussig bing anomaly" OR (("transposition" OR "transpositions" OR "transpos\*" OR ("TGA" NOT "transient global amnesia")) AND ("great vessel" OR "great vessels" OR "great arteries" OR "great artery" OR "large vessel" OR "large vessels" OR "large arteries" OR "large artery" OR "Aorta" OR "aorta" OR "aortas" OR "aortic" OR "great blood vessel")) OR "Arterial Switch Operation" OR "atrial switch" OR "arterial switch" OR "atrial switch\*" OR "arterial switch\*" OR "double switch operation" OR "double switch procedure" OR "double switch technique" OR "double switch operations" OR "double switch procedures" OR "double switch" OR "jatene operation" OR "jatene procedure" OR "jatene technique" OR "mustard operation" OR "mustard procedure" OR "mustard repair" OR "rastelli operation" OR "rastelli procedure" OR "rastelli repair" OR "rastelli technique" OR "senning operation" OR "senning procedure" OR "jatene" OR "mustard child\*" OR "mustard patient\*" OR "rastelli" OR "senning") OR SU("Great Vessels Transposition" OR "transposition of the great arteries" OR "transposition of the great artery" OR "transposition of great arteries" OR "transposition of great artery" OR "transposition of the great vessels" OR "transposition of great vessels" OR "transposition of great vessel" OR "great vessels transposition" OR "great arteries transposition" OR "congenitally corrected transposition" OR "congenitally corrected transpositions" OR "double outlet right ventricle" OR "double outlet right ventricles" OR "taussig bing anomaly" OR (("transposition" OR "transpositions" OR "transpos\*" OR ("TGA" NOT "transient global amnesia")) AND ("great vessel" OR "great vessels" OR "great arteries" OR "great artery" OR "large vessel" OR "large vessels" OR "large arteries" OR "large



artery" OR "Aorta" OR "aorta" OR "aortas" OR "aortic" OR "great blood vessel")) OR "Arterial Switch Operation" OR "atrial switch" OR "arterial switch" OR "atrial switch\*" OR "arterial switch\*" OR "double switch operation" OR "double switch procedure" OR "double switch technique" OR "double switch operations" OR "double switch procedures" OR "double switch" OR "jatene operation" OR "jatene procedure" OR "jatene technique" OR "mustard operation" OR "mustard procedure" OR "mustard repair" OR "rastelli operation" OR "rastelli procedure" OR "rastelli repair" OR "rastelli technique" OR "senning operation" OR "senning procedure" OR "jatene" OR "mustard child\*" OR "mustard patient\*" OR "rastelli" OR "senning") OR KW("Great Vessels Transposition" OR "transposition of the great arteries" OR "transposition of the great artery" OR "transposition of great arteries" OR "transposition of great artery" OR "transposition of the great vessels" OR "transposition of great vessels" OR "transposition of great vessel" OR "great vessels transposition" OR "great arteries transposition" OR "congenitally corrected transposition" OR "congenitally corrected transpositions" OR "double outlet right ventricle" OR "double outlet right ventricles" OR "taussig bing anomaly" OR (("transposition" OR "transpositions" OR "transpos\*" OR ("TGA" NOT "transient global amnesia")) AND ("great vessel" OR "great vessels" OR "great arteries" OR "great artery" OR "large vessel" OR "large vessels" OR "large arteries" OR "large artery" OR "Aorta" OR "aorta" OR "aortas" OR "aortic" OR "great blood vessel")) OR "Arterial Switch Operation" OR "atrial switch" OR "arterial switch" OR "atrial switch\*" OR "arterial switch\*" OR "double switch operation" OR "double switch procedure" OR "double switch technique" OR "double switch operations" OR "double switch procedures" OR "double switch" OR "jatene operation" OR "jatene procedure" OR "jatene technique" OR "mustard operation" OR "mustard procedure" OR "mustard repair" OR "rastelli operation" OR "rastelli procedure" OR "rastelli repair" OR "rastelli technique" OR "senning operation" OR "senning procedure" OR "jatene" OR "mustard child\*" OR "mustard patient\*" OR "rastelli" OR "senning") OR AB("Great Vessels Transposition" OR "transposition of the great arteries" OR "transposition of the great artery" OR "transposition of great arteries" OR "transposition of great artery" OR "transposition of the great vessels" OR "transposition of great vessels" OR "transposition of great vessel" OR "great vessels transposition" OR "great arteries transposition" OR "congenitally corrected transposition" OR "congenitally corrected transpositions" OR "double outlet right ventricle" OR "double outlet right ventricles" OR "taussig bing anomaly" OR (("transposition" OR "transpositions" OR "transpos\*" OR ("TGA" NOT "transient global amnesia")) AND ("great vessel" OR "great vessels" OR "great arteries" OR "great artery" OR "large vessel" OR "large vessels" OR "large arteries" OR "large artery" OR "Aorta" OR "aorta" OR "aortas" OR "aortic" OR "great blood vessel")) OR "Arterial Switch Operation" OR "atrial switch" OR "arterial switch" OR "atrial switch\*" OR "arterial switch\*" OR "double switch operation" OR "double switch procedure" OR "double switch technique" OR "double switch operations" OR "double switch procedures" OR "double switch" OR "jatene operation" OR "jatene procedure" OR "jatene technique" OR "mustard operation" OR "mustard procedure" OR "mustard repair" OR "rastelli operation" OR "rastelli procedure" OR "rastelli repair" OR "rastelli technique" OR "senning operation" OR "senning procedure" OR "jatene" OR "mustard child\*" OR "mustard patient\*" OR "rastelli" OR "senning")) AND (TI("Fibrosis" OR "heart muscle fibrosis" OR "fibrosis" OR "fibroses" OR "fibrotic" OR "fibros\*" OR "fibrot\*" OR "fibrous" OR "Fibroblast" OR "Heart Fibroblast" OR "fibroblast" OR "fibroblasts" OR "Myofibroblast" OR "myofibroblast" OR "myofibroblasts" OR "fibroblast\*" OR "fibrocellular" OR "fibrocell\*" OR "fibrocollagen\*" OR "fibrocollagenous" OR "myocardial remodelling" OR "myocardial remodeling" OR "myocardium remodelling" OR "myocardium remodeling" OR "myocardial remodel\*" OR "myocardium remodel\*" OR "Heart Ventricl Remodeling" OR "Ventricular Remodelling" OR "Ventricular Remodeling" OR "Ventricle Remodelling" OR "Ventricle Remodeling" OR "Ventricular Remodel\*" OR "Ventricle Remodel\*" OR "cardiac remodelling" OR "cardiac remodeling" OR "cardiac remodel\*") OR SU("Fibrosis" OR "heart muscle fibrosis" OR "fibrosis" OR "fibroses" OR "fibrotic" OR "fibros\*" OR "fibrot\*" OR "fibrous" OR "Fibroblast" OR "Heart Fibroblast" OR "fibroblast" OR "fibroblasts" OR "Myofibroblast" OR "myofibroblast" OR "myofibroblasts" OR "fibroblast\*" OR "fibrocellular" OR "fibrocell\*" OR "fibrocollagen\*" OR "fibrocollagenous" OR "myocardial remodelling" OR "myocardial remodeling" OR "myocardium remodelling" OR "myocardium remodeling" OR

"myocardial remodel\*" OR "myocardium remodel\*" OR "Heart Ventricl Remodeling" OR "Ventricular Remodelling" OR "Ventricular Remodeling" OR "Ventricle Remodelling" OR "Ventricle Remodeling" OR "Ventricular Remodel\*" OR "Ventricle Remodel\*" OR "cardiac remodelling" OR "cardiac remodeling" OR "cardiac remodel\*") OR KW("Fibrosis" OR "heart muscle fibrosis" OR "fibrosis" OR "fibroses" OR "fibrotic" OR "fibros\*" OR "fibrot\*" OR "fibrous" OR "Fibroblast" OR "Heart Fibroblast" OR "fibroblast" OR "fibroblasts" OR "Myofibroblast" OR "myofibroblast" OR "myofibroblasts" OR "fibroblast\*" OR "fibrocellular" OR "fibrocell\*" OR "fibrocollagen\*" OR "fibrocollagenous" OR "myocardial remodelling" OR "myocardial remodeling" OR "myocardium remodelling" OR "myocardium remodeling" OR "myocardial remodel\*" OR "myocardium remodel\*" OR "Heart Ventricl Remodeling" OR "Ventricular Remodelling" OR "Ventricular Remodeling" OR "Ventricle Remodelling" OR "Ventricle Remodeling" OR "Ventricular Remodel\*" OR "Ventricle Remodel\*" OR "cardiac remodelling" OR "cardiac remodeling" OR "cardiac remodel\*") OR AB("Fibrosis" OR "heart muscle fibrosis" OR "fibrosis" OR "fibroses" OR "fibrotic" OR "fibros\*" OR "fibrot\*" OR "fibrous" OR "Fibroblast" OR "Heart Fibroblast" OR "fibroblast" OR "fibroblasts" OR "Myofibroblast" OR "myofibroblast" OR "myofibroblasts" OR "fibroblast\*" OR "fibrocellular" OR "fibrocell\*" OR "fibrocollagen\*" OR "fibrocollagenous" OR "myocardial remodelling" OR "myocardial remodeling" OR "myocardium remodelling" OR "myocardium remodeling" OR "myocardial remodel\*" OR "myocardium remodel\*" OR "Heart Ventricl Remodeling" OR "Ventricular Remodelling" OR "Ventricular Remodeling" OR "Ventricle Remodelling" OR "Ventricle Remodeling" OR "Ventricular Remodel\*" OR "Ventricle Remodel\*" OR "cardiac remodelling" OR "cardiac remodeling" OR "cardiac remodel\*")) OR ((TI("Arterial Switch Operation" OR "atrial switch" OR "arterial switch" OR "atrial switch\*" OR "arterial switch\*" OR "double switch operation" OR "double switch procedure" OR "double switch technique" OR "double switch operations" OR "double switch procedures" OR "double switch" OR "jatene operation" OR "jatene procedure" OR "jatene technique" OR "mustard operation" OR "mustard procedure" OR "mustard repair" OR "rastelli operation" OR "rastelli procedure" OR "rastelli repair" OR "rastelli technique" OR "senning operation" OR "senning procedure" OR "jatene" OR "mustard child\*" OR "mustard patient\*" OR "rastelli" OR "senning") OR SU("Arterial Switch Operation" OR "atrial switch" OR "arterial switch" OR "atrial switch\*" OR "arterial switch\*" OR "double switch operation" OR "double switch procedure" OR "double switch technique" OR "double switch operations" OR "double switch procedures" OR "double switch" OR "jatene operation" OR "jatene procedure" OR "jatene technique" OR "mustard operation" OR "mustard procedure" OR "mustard repair" OR "rastelli operation" OR "rastelli procedure" OR "rastelli repair" OR "rastelli technique" OR "senning operation" OR "senning procedure" OR "jatene" OR "mustard child\*" OR "mustard patient\*" OR "rastelli" OR "senning") OR KW("Arterial Switch Operation" OR "atrial switch" OR "arterial switch" OR "atrial switch\*" OR "arterial switch\*" OR "double switch operation" OR "double switch procedure" OR "double switch technique" OR "double switch operations" OR "double switch procedures" OR "double switch" OR "jatene operation" OR "jatene procedure" OR "jatene technique" OR "mustard operation" OR "mustard procedure" OR "mustard repair" OR "rastelli operation" OR "rastelli procedure" OR "rastelli repair" OR "rastelli technique" OR "senning operation" OR "senning procedure" OR "jatene" OR "mustard child\*" OR "mustard patient\*" OR "rastelli" OR "senning") OR AB("Arterial Switch Operation" OR "atrial switch" OR "arterial switch" OR "atrial switch\*" OR "arterial switch\*" OR "double switch operation" OR "double switch procedure" OR "double switch technique" OR "double switch operations" OR "double switch procedures" OR "double switch" OR "jatene operation" OR "jatene procedure" OR "jatene technique" OR "mustard operation" OR "mustard procedure" OR "mustard repair" OR "rastelli operation" OR "rastelli procedure" OR "rastelli repair" OR "rastelli technique" OR "senning operation" OR "senning procedure" OR "jatene" OR "mustard child\*" OR "mustard patient\*" OR "rastelli" OR "senning")) AND (TI("Histology" OR "histology" OR "histolog\*" OR "histocyto\*") OR SU("Histology" OR "histology" OR "histolog\*" OR "histocyto\*") OR KW("Histology" OR "histology" OR "histolog\*" OR "histocyto\*") OR AB("Histology" OR "histology" OR "histolog\*" OR "histocyto\*"))))

## Search strategy Innervation:

### PubMed

<http://www.ncbi.nlm.nih.gov/pubmed?otool=leiden>

Arterial Switch Operation & innervation/blood flow & imaging: 65 referenties d.d. 10-2-2021, incl. de 5 bekende (zonder de imaging component: 92 referenties).

((("Arterial Switch Operation"[Mesh] OR "Arterial Switch Operation"[tw] OR "Arterial Switch Operations"[tw] OR "arterial switch procedure"[tw] OR "arterial switch procedures"[tw] OR "arterial switch repair"[tw] OR "arterial switch surgery"[tw] OR "arterial switch"[tw] OR "Arterial Switch Technique"[tw] OR "Double Switch Operation"[tw] OR "Double Switch Operations"[tw] OR "Double Switch Procedure"[tw] OR "Double Switch Procedures"[tw] OR "Double Switch Technique"[tw] OR "Double Switch"[tw] OR "Jatene Operation"[tw] OR "Jatene Procedure"[tw] OR "Jatene Technique"[tw]) AND ("innervation"[subheading] OR "Heart/innervation"[Mesh] OR "innervation"[tw] OR "innervat\*"[tw] OR "reinnervation"[tw] OR "reinnervat\*"[tw] OR "Denervation"[Mesh] OR "denervation"[tw] OR "denerv\*"[tw] OR "cardiac autonomic nerve"[tw] OR "autonomic cardiac nerve"[tw] OR "Cardiac sympathetic nerve"[tw] OR "sympathetic cardiac nerve"[tw] OR "sympathetic nerve"[tw] OR "autonomic nerve"[tw] OR "cardiac autonomic nerves"[tw] OR "autonomic cardiac nerves"[tw] OR "Cardiac sympathetic nerves"[tw] OR "sympathetic cardiac nerves"[tw] OR "sympathetic nerves"[tw] OR "autonomic nerves"[tw] OR "Sympathetic Nervous System"[mesh] OR "Autonomic Nervous System"[Mesh] OR "Nervous System"[Mesh] OR "Nervous System"[tw] OR "myocardial blood flow"[tw] OR "Coronary Circulation"[mesh] OR "coronary flow reserve"[tw] OR " Autonomic dysfunction"[tw] OR " Heart rate variability"[tw] OR " Vasomotor (re)activity"[tw] OR " Respiratory Sinus *arrhythmia* "[tw] OR " Baroreflex sensitivity"[tw] OR " The pre-ejection period "[tw] OR " MIBG"[tw] OR " Heart rate recovery"[tw] OR " Heart rate reserve"[tw] OR " QT variability"[tw]) AND ("Diagnostic Imaging"[mesh] OR "Diagnostic imaging"[subheading] OR "imaging"[tw] OR "PET"[tw] OR "positron emission"[tw] OR "perfusion"[tw] OR "adenosine"[tw] OR "echography"[tw] OR "ultrasound"[tw] OR "ultrasonography"[tw] OR "CT"[tw] OR "MRI"[tw] OR "MR imaging"[tw] OR "magnetic resonance"[tw] OR "perfusion\*"[tw] OR "adenosine\*"[tw] OR "echogra\*"[tw] OR "ultrason\*"[tw] OR "sonography"[tw] OR "sonogra\*"[tw] OR "echocardiography"[tw] OR "echocardiogra\*"[tw] OR "MR imag\*"[tw]))

Autonomic dysfunction

Heart rate variability

Vasomotor (re)activity

Respiratory Sinus *arrhythmia* (parasymptatische activiteit)

Baroreflex sensitivity

The pre-ejection period

MIBG

Heart rate recovery

Heart rate reserve

QT variability

## Embase

<http://ovidsp.ovid.com/ovidweb.cgi?T=JS&PAGE=main&MODE=ovid&D=oemezd>

("Arterial Switch Operation"/ OR "Arterial Switch Operation"." OR "Arterial Switch Operations".ti,ab OR "arterial switch procedure".ti,ab OR "arterial switch procedures".ti,ab OR "arterial switch repair".ti,ab OR "arterial switch surgery".ti,ab OR "arterial switch".ti,ab OR "Arterial Switch Technique".ti,ab OR "Double Switch Operation".ti,ab OR "Double Switch Operations".ti,ab OR "Double Switch Procedure".ti,ab OR "Double Switch Procedures".ti,ab OR "Double Switch Technique".ti,ab OR "Double Switch".ti,ab OR "Jatene Operation".ti,ab OR "Jatene Procedure".ti,ab OR "Jatene Technique".ti,ab)

## Web of Science

<http://isiknowledge.com/wos>

TS=("Arterial Switch Operation" OR "Arterial Switch Operation" OR "Arterial Switch Operations" OR "arterial switch procedure" OR "arterial switch procedures" OR "arterial switch repair" OR "arterial switch surgery" OR "arterial switch" OR "Arterial Switch Technique" OR "Double Switch Operation" OR "Double Switch Operations" OR "Double Switch Procedure" OR "Double Switch Procedures" OR "Double Switch Technique" OR "Double Switch" OR "Jatene Operation" OR "Jatene Procedure" OR "Jatene Technique") AND TS= ("innervation" OR "innervat\*" OR "reinnervation" OR "reinnervat\*" OR "Denervation" OR "denervation" OR "denerv\*" OR "cardiac autonomic nerve" OR "autonomic cardiac nerve" OR "Cardiac sympathetic nerve" OR "sympathetic cardiac nerve" OR "sympathetic nerve" OR "autonomic nerve" OR "cardiac autonomic nerves" OR "autonomic cardiac nerves" OR "Cardiac sympathetic nerves" OR "sympathetic cardiac nerves" OR "sympathetic nerves" OR "autonomic nerves" OR "Sympathetic Nervous System")

## Cochrane

<https://www.cochranelibrary.com/advanced-search/search-manager>

("Arterial Switch Operation" OR "Arterial Switch Operation" OR "Arterial Switch Operations" OR "arterial switch procedure" OR "arterial switch procedures" OR "arterial switch repair" OR "arterial switch surgery" OR "arterial switch" OR "Arterial Switch Technique" OR "Double Switch Operation" OR "Double Switch Operations" OR "Double Switch Procedure" OR "Double Switch Procedures" OR "Double Switch Technique" OR "Double Switch" OR "Jatene Operation" OR "Jatene Procedure" OR "Jatene Technique");ti,ab,kw

**Emcare** <http://ovidsp.ovid.com/ovidweb.cgi?T=JS&NEWS=n&CSC=Y&PAGE=main&D=emcr>

## GoogleScholar

"Arterial Switch"|"Double Switch Operation"|"Double Switch"|"Jatene" "innervation"|"reinnervation"

"Denervation"|"denervation"|"denerv\*"|"cardiac autonomic nerve"|"autonomic cardiac nerve"|"Cardiac sympathetic nerve"|"sympathetic cardiac nerve"|"sympathetic nerve"|"autonomic nerve"|"cardiac autonomic nerves"|"autonomic cardiac nerves"|"Cardiac sympathetic

nerves"|"sympathetic cardiac nerves"|"sympathetic nerves"|"autonomic nerves"|"Sympathetic Nervous System
